# Supplementary material
Source: PubMed Central journal article supplement (PMC5798601)
Supplement: NIHMS908111-supplement-8.pdf [file NIHMS908111-supplement-8.pdf]

**Table S1 | X-ray data collection and refinement statistics for TEFM. Related to Figure**

1

|                                            | TEFM CTD<br>PDB ID: 5OL8                   | TEFM CTD<br>SeMet-SAD <sup>a</sup>         | TEFM NTD<br>PDB ID: 5OL9                   | TEFM NTD<br>S-SAD                          |
|--------------------------------------------|--------------------------------------------|--------------------------------------------|--------------------------------------------|--------------------------------------------|
| <b>Data collection</b>                     |                                            |                                            |                                            |                                            |
| Space group                                | C2                                         | C2                                         | P4 <sub>3</sub> 2 <sub>1</sub> 2           | P4 <sub>3</sub> 2 <sub>1</sub> 2           |
| Cell dimensions                            |                                            |                                            |                                            |                                            |
| a, b, c (Å)                                | 98.48, 112.54,<br>88.84                    | 97.57, 112.79,<br>88.84                    | 47.67, 47.67,<br>93.40                     | 47.72, 47.72,<br>93.32                     |
| α, β, γ (°)                                | 90.00, 110.13,<br>90.00                    | 90, 109.76,<br>90.00                       | 90.00, 90.00,<br>90.00                     | 90.00, 90.00,<br>90.00                     |
| Wavelength                                 | 1.0000                                     | 0.9765                                     | 1.0000                                     | 2.0664                                     |
| Resolution (Å) <sup>a</sup>                | 46.23 – 1.90<br>(1.94 – 1.90) <sup>b</sup> | 48.32 – 2.68<br>(2.74 – 2.68) <sup>b</sup> | 42.46 – 1.30<br>(1.33 – 1.30) <sup>b</sup> | 42.49 – 2.10<br>(2.14 – 2.10) <sup>b</sup> |
| R <sub>meas</sub>                          | 0.056 (2.78)                               | 0.24 (3.50)                                | 0.107 (4.67)                               | 0.096 (2.51)                               |
| I/σ(I)                                     | 17.92 (0.79)                               | 9.45 (0.62)                                | 20.26 (0.60)                               | 41.67 (7.74)                               |
| CC <sub>1/2</sub>                          | 100.0 (35.3)                               | 99.7 (32.6)                                | 100.0 (41.3)                               | 100.0 (95.1)                               |
| Completeness (%)                           | 98.1 (89.5)                                | 99.7 (98.8)                                | 99.7 (98.1)                                | 99.4 (96.1)                                |
| Redundancy                                 | 6.60 (5.04)                                | 11.86 (6.25)                               | 25.05 (24.01)                              | 37.62 (25.64)                              |
| <b>Refinement</b>                          |                                            |                                            |                                            |                                            |
| Resolution (Å)                             | 46.23 – 1.90                               |                                            | 42.46 – 1.30                               |                                            |
| No. reflections                            | 70117                                      |                                            | 27057                                      |                                            |
| R <sub>work</sub> / R <sub>free</sub>      | 0.195 / 0.228                              |                                            | 0.190 / 0.197                              |                                            |
| No. atoms                                  |                                            |                                            |                                            |                                            |
| Protein                                    | 6724                                       |                                            | 692                                        |                                            |
| Ligands                                    | 24                                         |                                            | 4                                          |                                            |
| Water                                      | 129                                        |                                            | 80                                         |                                            |
| B factors                                  |                                            |                                            |                                            |                                            |
| Protein                                    | 67.33                                      |                                            | 27.16                                      |                                            |
| Ligands                                    | 79.72                                      |                                            | 56.01                                      |                                            |
| Water                                      | 57.78                                      |                                            | 38.21                                      |                                            |
| r.m.s deviations                           |                                            |                                            |                                            |                                            |
| Bond lengths (Å)                           | 0.003                                      |                                            | 0.009                                      |                                            |
| Bond angles (°)                            | 0.51                                       |                                            | 0.95                                       |                                            |
| Ramachandran                               |                                            |                                            |                                            |                                            |
| Preferred /<br>allowed /<br>disallowed (%) | 97.5 / 2.5 / 0.0                           |                                            | 98.7 / 1.3 / 0.0                           |                                            |

<sup>a</sup> The data reflect the merged results from several crystals<sup>b</sup> Values in parentheses are for highest-resolution shell.

**Table S2 | X-ray data collection and refinement statistics for the EC-TEFM complex.***Related to Figure 4.*

|                                                     | EC-TEFM Complex <sup>a</sup><br>PDB ID: 5OLA |
|-----------------------------------------------------|----------------------------------------------|
| <b>Data collection</b>                              |                                              |
| Space group                                         | C2                                           |
| Cell dimensions                                     |                                              |
| <i>a, b, c</i> (Å)                                  | 224.53, 155.55, 164.19                       |
| $\alpha, \beta, \gamma$ (°)                         | 90.00, 113.59, 90.00                         |
| Wavelength                                          | 1.0000                                       |
| Resolution (Å) <sup>a</sup>                         | 49.16 – 3.90 (4.00 – 3.90) <sup>b</sup>      |
| <i>R</i> <sub>meas</sub>                            | 0.258 (2.187)                                |
| <i>I</i> / $\sigma$ ( <i>I</i> )                    | 9.72 (1.44)                                  |
| <i>CC</i> <sub>1/2</sub>                            | 99.7 (54.5)                                  |
| Completeness (%)                                    | 99.6 (97.7)                                  |
| Redundancy                                          | 13.12 (12.50)                                |
| <b>Refinement</b>                                   |                                              |
| Resolution (Å)                                      | 48.87 – 3.90                                 |
| No. reflections                                     | 46930                                        |
| <i>R</i> <sub>work</sub> / <i>R</i> <sub>free</sub> | 0.243 / 0.276                                |
| No. atoms                                           |                                              |
| Macromolecules                                      | 25122                                        |
| Ligands                                             | 0                                            |
| Water                                               | 0                                            |
| <i>B</i> factors                                    |                                              |
| Macromolecules                                      | 160.94                                       |
| Ligands                                             | 0                                            |
| Water                                               | 0                                            |
| r.m.s deviations                                    |                                              |
| Bond lengths (Å)                                    | 0.004                                        |
| Bond angles (°)                                     | 0.63                                         |
| Ramachandran                                        |                                              |
| Preferred / allowed / disallowed (%)                | 94.2 / 5.1 / 0.6                             |

<sup>a</sup> The data reflect the merged results from two datasets.<sup>b</sup> Values in parentheses are for highest-resolution shell.

**Table S3 | List of oligonucleotides used. Related to STAR Methods.**

| REAGENT OR RESOURCE <sup>a</sup>                                 | SOURCE                         | IDENTIFIER |
|------------------------------------------------------------------|--------------------------------|------------|
| RNA14mt<br>agucugcgcgcg                                          | (Schwinghammer et al,<br>2013) | N/A        |
| NT25HH<br>GAACATGGTGTAAATTATTTTCGACGCCAG<br>ACGAAC               | This paper                     | N/A        |
| TS22HH<br>GTTTCGTCTGGCGTGCGCGCCGCTACAC<br>CATGTTC                | This paper                     | N/A        |
| TS26<br>GGGCTTAGTTCGTCTGGCGTGCGCGCC<br>GCTACACCATGTTTGCTGACC     | This paper                     | N/A        |
| NT26A<br>GGTCAGCAAACATGGTGTAAAGTATTACG<br>ACGCCAGACGAACTAAGCCC   | This paper                     | N/A        |
| RNA14HH<br>ugaugguaaugcuccugucgugauc                             | This paper                     | N/A        |
| NT19HH<br>CATGGGGTAACTAGTTCTGA<br>CGCCAGACG                      | This paper                     | N/A        |
| TS16HH<br>CGTCTGGCGTGATCACGACTACCCCAT<br>G                       | This paper                     | N/A        |
| NT_LSP<br>TGTTAGTTGGGGGGTGACTGTTAAAAGT<br>GCATACCTATCCCCGATAGGCC | This paper                     | N/A        |
| TS_LSP<br>GGCCTATCTTTTGGCGGTATGCACTTTT<br>AACAGTCACCCCCCACTAACA  | This paper                     | N/A        |
| RNA10<br>cugcgcgcau                                              | This paper                     | N/A        |
| TS1<br>GGGTCCTGTCTGAAATCGACATCGCCG<br>C                          | This paper                     | N/A        |
| NT1<br>CGATTTTCAGACAGGACCC                                       | This paper                     | N/A        |

<sup>a</sup> DNA = UPPERCASE; RNA = lowercase
